# Supplementary material
Source: publisher site journal article supplement (https://www.dovepress.com/get_supplementary_file.php?f=238245.docx)
Supplement: Supplementary file 1 [file get_supplementary_file.php]

**Supplementary materials**

The chemical structure data of reported compounds in this study are described in full.

**(2E,4E)-5-(benzo[d][1,3]dioxol-5-yl)-1-(piperidin-1-yl)penta-2,4-dien-1-one(1)**

Yield 85%. 1H NMR (DMSO-d6,400 MHz): δ 5.93 (d, 1H, J= 15.5 Hz), 6.05 (s, 2H); 6.91-6.98(m, 3H), 7.01 (dd, 1H, J= 1.5 Hz, J= 8.0 Hz), 7.23 (d, 1H, J= 1.5 Hz), 7.27-7.34 (m, 1H). 13C NMR(DMSO-d6, 101 MHz, ) δ 101.8, 106.2, 108.9, 121.6, 123.5, 125.3 , 130.9, 140.1, 145.1, 148.4, 148.5, 167.2. LC-MS calculated for C12H10O4 expected [M]: 218.2; found [M+H]+: 219.2.

**Methyl 2-((2E,4E)-5-(benzo[d][1,3] dioxol-5-yl)penta-2,4-dienamido)propanoate(2a)**

Yield 69.42%. 1H NMR (CDCl3, 400 MHz): δ1.42-1.44 (d, 3H), 3.75 (s, 3H), 4.66-4.73 (m, H), 6.26-6.28 (d,1H), 7.25-7.38(dd, H), 7.25-7.38 (dd,H), 6.61-6.68(dd, 1H), 6.72-6.73(d,1H), 6.75-6.76(d,1H), 6.94(s,1H), 6.84-6.86(d,1H), 5.95(s,2H). 13C NMR(CDCl3, 101 MHz, ) δ 173.83, 165.66, 148.38, 148.29, 141.84, 139.40, 130.85, 124.62, 122.77, 122.51, 108.55, 105.86, 101.40, 52.58, 48.18, 18.65. LC-MS calculated for C16H17NO5 expected [M]: 303.3; found [M+H]+: 304.1.

**Ethyl 2-((2E,4E)-5-(benzo[d] [1,3] dioxol-5-yl) penta-2,4-dienamido) acetate(2b)**

Yield 74.65%.1H NMR (CDCl3, 400 MHz, ) δ 7.36 (dd, J = 14.9, 10.7 Hz, 1H), 6.94 (s, 1H), 6.85 (dd, J = 8.0, 1.8 Hz, 1H), 6.79 – 6.59 (m, 3H), 6.24 (d, J = 5.4 Hz, 1H), 5.95 (d, J = 2.2 Hz, 2H), 4.21 (q, J = 7.2 Hz, 2H), 4.12 (d, J = 5.0 Hz, 2H), 1.27 (t, J = 7.2 Hz, 3H). 13C NMR (101 MHz, ) δ 172.31, 166.00, 148.38, 148.30, 141.83, 139.34, 130.89, 124.64, 122.76, 122.71, 108.57, 105.85, 101.40, 61.37, 57.13, 31.70, 19.01, 17.94, 14.31. LC-MS calculated for C16H17NO5 expected [M]: 303.3; found [M+H]+: 304.1.

**Ethyl 2-((2E,4E)-5-(benzo[d] [1,3] -5-yl) penta-2,4-dienamido)-3-methylbutanoate(2c)**

Yield 80.45%. 1H NMR (400 MHz, ) δ 7.35 (dd, J = 14.9, 10.6 Hz, 1H), 6.96 (s, 1H), 6.87 (dd, J = 8.1, 1.7 Hz, 1H), 6.79 – 6.61 (m, 3H), 6.08 (d, J = 8.9 Hz, 1H), 5.99 (s, 0H), 5.96 (s, 2H), 4.66 (dd, J = 8.8, 4.9 Hz, 1H), 4.20 (qq, J = 7.0, 3.6 Hz, 2H), 2.19 (pd, 1H), 1.28 (t, J = 7.1 Hz, 3H), 0.94 (dd, J = 12.6, 6.9 Hz, 6H). 13C NMR (101 MHz, ) δ 172.31, 166.00, 148.38, 148.30, 141.83, 139.34, 130.89, 124.64, 122.76, 122.71, 108.57, 105.85, 101.40, 61.37, 57.13, 31.70, 19.01, 17.94, 14.31. LC-MS calculated for C19H23NO5 expected [M]: 345.4; found [M+H]+: 346.2.

**methyl ((2E,4E)-5-(benzo[d][1,3]dioxol-5-yl)penta-2,4-dienoyl)methioninate (2d)**

Yield 82.16%. 1H NMR (400 MHz, Chloroform-d) δ 7.40 – 7.23 (m, 1H), 6.96 (s, 1H), 6.87 (dd, J = 8.1, 1.6 Hz, 1H), 6.79 – 6.62 (m, 3H), 6.32 (d, J = 7.1 Hz, 1H), 5.96 (s, 2H), 4.80 (d, J = 7.1 Hz, 1H), 2.60 – 2.46 (m, 2H), 2.33 – 1.82 (m, 5H), 1.28 (d, J = 10.3 Hz, 3H). 13C NMR (101 MHz, Chloroform-d) δ 172.29, 165.93, 148.44, 148.32, 142.05, 139.59, 130.84, 124.57, 122.83, 122.39, 108.59, 105.88, 101.42, 61.83, 51.81, 32.13, 30.09, 15.59. LC-MS calculated for C18H21NO5S expected [M]: 363.4; found [M+H]+: 364.1.

**ethyl ((2E,4E)-5-(benzo[d][1,3]dioxol-5-yl)penta-2,4-dienoyl)leucinate (2e)**

Yield 83.07%. 1H NMR (400 MHz, Methanol-d4) δ 7.27 (dd, J = 15.0, 8.1, 2.0 Hz, 1H), 7.04 (d, J = 1.7 Hz, 1H), 6.93 (dd, J = 8.1, 1.7 Hz, 1H), 6.83 – 6.72 (m, 3H), 6.12 (d, J = 15.1 Hz, 1H), 5.93 (s, 2H), 4.55 – 4.46 (m, 1H), 4.15 (q, J = 7.1 Hz, 2H), 1.68 (ddd, J = 12.3, 7.8, 6.1 Hz, 1H), 1.66 – 1.55 (m, 2H), 1.24 (t, J = 7.1 Hz, 3H), 0.93 (dd, J = 14.1, 6.3 Hz, 6H). 13C NMR (101 MHz, DMSO-d6) δ 174.77, 165.78, 148.48, 148.30, 140.44, 138.71, 131.37, 125.72, 124.54, 123.26, 108.98, 106.22, 101.80, 50.87, 40.57, 24.93, 23.38, 21.83. LC-MS calculated for C20H25NO5 expected [M]: 359.4; found [M+H]+: 360.2.

**Ethyl 2-((2E,4E)-5-(benzo[d] [1,3] dioxol-5-yl) penta-2,4-dienamido)-3-phenylpropanoate(2f)**

Yield 85.16%.1H NMR (400 MHz, Chloroform-d) δ 7.35 (dd, J = 14.9, 10.8 Hz, 1H), 7.32 – 7.23 (m, 2H), 7.26 – 7.14 (m, 1H), 7.15 – 7.07 (m, 2H), 6.96 (d, J = 1.7 Hz, 1H), 6.88 (dd, J = 8.1, 1.7 Hz, 1H), 6.84 – 6.72 (m, 2H), 6.65 (dd, J = 15.4, 10.8 Hz, 1H), 6.05 – 5.97 (m, 1H), 5.98 – 5.94 (m, 7H), 5.95 (s, 0H), 4.97 (dt, J = 7.9, 5.7 Hz, 1H), 4.17 (qd, J = 7.1, 1.2 Hz, 2H), 3.24 – 3.09 (m, 2H), 1.24 (t, J = 7.2 Hz, 3H). 13C NMR (101 MHz, Chloroform-d) δ 171.75, 165.61, 148.44, 148.33, 141.97, 139.53, 136.04, 130.86, 129.50, 128.60, 127.16, 124.61, 122.81, 122.43, 108.60, 105.87, 101.42, 61.65, 53.36, 38.08, 14.22. LC-MS calculated for C23H23NO5 expected [M]: 393.4; found [M+H]+: 394.2.

**Ethyl 2-((2E,4E)-5-(benzo[d] [1,3] dioxol-5-yl) penta-2,4-dienamido)-3-hydroxypropanoate(2g)**

Yield 90.90%. 1H NMR (400 MHz, Chloroform-d) 1H NMR (400 MHz, Chloroform-d) δ 7.35 (dd, J = 14.9, 10.8 Hz, 1H), 7.32 – 7.23 (m, 2H), 7.26 – 7.14 (m, 1H), 7.15 – 7.07 (m, 2H), 6.96 (d, J = 1.7 Hz, 1H), 6.88 (dd, J = 8.1, 1.7 Hz, 1H), 6.84 – 6.72 (m, 2H), 5.98 – 5.94 (m, 2H), 6.65 (dd, J = 15.4, 10.8 Hz, 1H), 6.05 – 5.97 (m, 1H), 5.96 (s, 2H), 4.97 (dt, J = 7.9, 5.7 Hz, 1H), 4.17 (qd, J = 7.1, 1.2 Hz, 2H), 3.24 – 3.09 (m, 2H), 1.24 (t, J = 7.2 Hz, 3H). 13C NMR (101 MHz, Chloroform-d) δ 171.75, 165.61, 148.44, 148.33, 141.97, 139.53, 136.04, 130.86, 129.50, 128.60, 127.16, 124.61, 122.81, 122.43, 108.60, 105.87, 101.42, 61.65, 53.36, 38.08, 14.22. LC-MS calculated for C17H19NO6 expected [M]: 333.3; found [M+H]+: 334.1.

**ethyl ((2E,4E)-5-(benzo[d][1,3]dioxol-5-yl)penta-2,4-dienoyl)tyrosinate (2h)**

Yield 75.26%. 1H NMR (400 MHz, DMSO-d6) δ 9.18 (s, 1H), 8.41 (dd, J = 8.2, 2.9 Hz, 1H), 7.22 (s, 1H), 7.08 (dd, J = 15.2, 7.0, 2.5 Hz, 1H), 7.01 – 6.77 (m, 6H), 6.66 – 6.57 (m, 2H), 6.10 (d, J = 15.0, 3.3 Hz, 1H), 6.04 (d, J = 1.9 Hz, 0H), 6.02 – 5.99 (m, 2H), 4.47 – 4.36 (m, 1H), 4.06 – 3.95 (m, 2H), 2.99 – 2.71 (m, 2H), 1.12 – 1.03 (m, 3H). 13C NMR (101 MHz, DMSO-d6) δ 172.40, 165.74, 156.54, 148.48, 148.33, 140.69, 138.91, 131.33, 130.54, 127.75, 125.66, 124.20, 123.30, 115.55, 108.98, 106.21, 101.81, 60.96, 54.72, 36.68, 14.53. LC-MS calculated for C23H23NO6 expected [M]: 409.4; found [M+H]+: 410.2.

**Ethyl 2-((2E,4E)-5-(benzo[d] [1,3] dioxol-5-yl) penta-2,4-dienamido)-3-mercaptopropanoate(2i)**

Yield 87.98%. 1H NMR (400 MHz, Chloroform-d) δ 7.40 (dd, J = 14.9, 10.7 Hz, 1H), 6.91 – 6.68 (m, 5H), 6.07 (d, J = 14.9 Hz, 1H), 5.94 (t, J = 1.3 Hz, 2H), 5.03 – 4.95 (m, 1H), 4.28 – 4.18 (m, 2H), 3.62 – 3.10 (m, 2H), 1.30 (d, J = 7.1 Hz, 3H). 13C NMR (101 MHz, Chloroform-d) δ 170.57, 166.16, 148.45, 148.27, 142.44, 139.88, 130.75, 124.59, 122.88, 122.31, 108.53, 105.90, 101.41, 62.18, 52.26, 41.70, 14.22. LC-MS calculated for C17H19NO5S expected [M]: 349.4; found [M+H]+: 350.1.

**Ethyl 2-((2E,4E)-5-(benzo[d] [1,3] dioxol-5-yl) penta-2,4-dienamido)-3-(1H-indol-3-yl) propanoate(2j)**

Yield 85.05%. 1H NMR (400 MHz, Chloroform-d) δ 8.27 (s, 1H), 7.54 (dd, 1H), 7.39 – 7.28 (m, 2H), 7.17 (ddd, J = 8.1, 7.0, 1.2 Hz, 1H), 7.09 (d, J = 7.9, 7.1, 1.1 Hz, 1H), 7.00 – 6.91 (m, 2H), 6.88 – 6.68 (m, 3H), 6.60 (dd, J = 15.4, 10.8 Hz, 1H), 6.16 (d, J = 7.8 Hz, 1H), 5.96 (s, 2H), 5.08 – 4.99 (m, 1H), 4.13 (dddd, J = 17.9, 10.8, 7.1, 3.6 Hz, 2H), 3.44 – 3.27 (m, 2H), 1.21 (t, J = 7.1 Hz, 3H). 13C NMR (101 MHz, Chloroform-d) δ 172.10, 165.89, 148.43, 148.32, 141.95, 139.49, 136.21, 130.87, 127.89, 124.64, 122.97, 122.82, 122.54, 122.28, 119.76, 118.81, 111.38, 110.23, 108.59, 105.88, 101.42, 61.64, 53.32, 27.85, 14.19. LC-MS calculated for C25H24N2O5 expected [M]: 432.5; found [M+H]+: 433.2.

**3-((2E,4E)-5-(benzo[d] [1,3] dioxol-5-yl) penta-2,4-dienamido) butanoic acid(2k)**

Yield 58.68%. 1H NMR (400 MHz, DMSO-d6) δ 8.31 (d, J = 7.4 Hz, 1H), 7.23 (d, J = 1.6 Hz, 1H), 7.13 (dd, J = 15.0, 10.1 Hz, 1H), 6.96 (dd, J = 8.1, 1.7 Hz, 1H), 6.93 – 6.78 (m, 3H), 6.11 (d, J = 15.0 Hz, 1H), 6.00 (s, 2H), 4.26 (t, J = 7.3 Hz, 1H), 1.26 (d, J = 7.3 Hz, 3H). 13C NMR (101 MHz, DMSO-d6) δ 174.80, 165.51, 148.48, 148.30, 140.45, 138.74, 131.36, 125.71, 124.50, 123.27, 108.98, 106.22, 101.80, 48.11, 17.79. LC-MS calculated for C15H15NO5 expected [M]: 289.3; found [M+H]+: 290.3.

**2-((2E,4E)-5-(benzo[d][1,3] dioxol-5-yl)penta-2,4-dienamido)acetic acid(2l)**

Yield 94.65%. 1H NMR (400 MHz, ) δ 8.34 (d, J = 4.8 Hz, 1H), 7.30 – 7.16 (m, 1H), 7.17 – 7.07 (m, 1H), 6.99 – 6.75 (m, 4H), 6.12 (dd, J = 15.0, 4.5 Hz, 1H), 6.00 (d, J = 4.6 Hz, 2H), 3.81 (t, J = 5.1 Hz, 3H), 2.46 (tt, J = 3.8, 1.9 Hz, 1H).13C NMR (101 MHz, DMSO-d6) δ 171.94, 166.11, 148.48, 148.31, 140.50, 138.78, 131.35, 125.70, 124.42, 123.27, 108.98, 106.20, 101.80, 41.27. LC-MS calculated for C14H13NO5 expected [M]: 275.3; found [M+H]+: 276.1.

**2-((2E,4E)-5-(benzo[d][1,3] dioxol-5-yl)penta-2,4-dienamido)acetic acid(2m)**

Yield 59.58%. 1H NMR (400 MHz, ) δ 7.35 (dd, J = 14.9, 10.6 Hz, 1H), 6.96 (s, 1H), 6.87 (dd, J = 8.1, 1.7 Hz, 1H), 6.79 – 6.61 (m, 3H), 6.08 (d, J = 8.9 Hz, 1H), 5.99 (s, 0H), 5.96 (s, 2H), 4.66 (dd, J = 8.8, 4.9 Hz, 1H), 4.20 (qq, J = 7.0, 3.6 Hz, 2H), 2.19 (pd, 1H), 1.28 (t, J = 7.1 Hz, 3H), 0.94 (dd, J = 12.6, 6.9 Hz, 6H). 13C NMR (101 MHz, DMSO-d6) δ 173.70, 165.99, 148.48, 148.29, 140.45, 138.71, 131.37, 125.71, 124.64, 123.25, 108.98, 106.23, 101.80, 57.85, 30.41, 19.73, 18.67. LC-MS calculated for C17H19NO5 expected [M]: 317.3; found [M+H]+: 318.1.

**((2E,4E)-5-(benzo[d][1,3]dioxol-5-yl)penta-2,4-dienoyl)methionine (2n)**

Yield 87.04%. 1H NMR (400 MHz, DMSO-d6) δ 8.30 (d, J = 7.9 Hz, 1H), 7.23 (s, 1H), 7.13 (dd, J = 15.0, 10.0 Hz, 1H), 6.96 (dd, J = 8.1, 1.7 Hz, 1H), 6.94 – 6.79 (m, 3H), 6.12 (d, J = 15.0 Hz, 1H), 6.00 (s, 2H), 4.36 (ddd, J = 9.1, 7.8, 4.6 Hz, 1H), 2.54 – 2.38 (m, 2H), 2.25 – 1.53 (m, 5H). 13C NMR (101 MHz, DMSO-d6) δ 173.99, 165.91, 148.48, 148.32, 140.57, 138.82, 131.36, 125.70, 124.42, 123.29, 108.98, 106.22, 101.81, 51.62, 31.32, 30.30, 15.10. LC-MS calculated for C17H19NO5Sexpected [M]: 349.4; found [M+H]+: 350.1.

**((2E,4E)-5-(benzo[d][1,3]dioxol-5-yl)penta-2,4-dienoyl)leucine(2o)**

Yield 90.57%. 1H NMR (400 MHz, DMSO-d6) δ 12.48 (s, 1H), 8.26 (dd, J = 8.0, 1.8 Hz, 1H), 7.23 (d, J = 1.6 Hz, 1H), 7.12 (dd, J = 15.0, 10.0 Hz, 1H), 6.96 (dd, J = 8.1, 1.7 Hz, 1H), 6.95 – 6.78 (m, 3H), 6.13 (d, J = 15.0 Hz, 1H), 6.00 (s, 2H), 4.33 – 4.23 (m, 1H), 1.68 – 1.42 (m, 3H), 0.86 (d, J = 6.5 Hz, 3H), 0.81 (d, J = 6.4 Hz, 3H). 13C NMR (101 MHz, DMSO-d6) δ 174.77, 165.78, 148.48, 148.30, 140.44, 138.71, 131.37, 125.72, 124.54, 123.26, 108.98, 106.22, 101.80, 50.87, 40.57, 24.93, 23.38, 21.83. LC-MS calculated for C18H21NO5 expected [M]: 331.4; found [M+H]+: 332.2.

**2-((2E,4E)-5-(benzo[d][1,3]dioxol-5-yl)penta-2,4-dienamido)-3-phenylpropanoic acid(2p)**

Yield 80.12%.1H NMR (400 MHz, DMSO-d6) δ 8.37 (d, J = 8.1 Hz, 1H), 7.28 – 7.19 (m, 5H), 7.18 – 7.14 (m, 1H), 7.07 (dd, J = 15.0, 9.8 Hz, 1H), 6.94 (dd, J = 8.1, 1.7 Hz, 1H), 6.89 – 6.76 (m, 3H), 6.10 (d, J = 15.0 Hz, 1H), 6.00 (s, 2H), 4.48 (ddd, J = 9.6, 8.0, 4.7 Hz, 1H), 3.13 – 2.79 (m, 2H). 13C NMR (101 MHz, DMSO-d6) δ 173.69, 165.71, 148.47, 148.31, 140.49, 138.78, 138.30, 131.35, 129.61, 128.72, 126.95, 125.68, 124.44, 123.27, 108.98, 106.20, 101.81, 54.19, 37.31. LC-MS calculated for C21H19NO5 expected [M]: 365.4; found [M+H]+: 366.1.

**2-((2E,4E)-5-(benzo[d][1,3]dioxol-5-yl)penta-2,4-dienamido)-3-hydroxypropanoic acid(2q)**

Yield 77.71%. 1H NMR (400 MHz, DMSO-d6) δ 8.21 (d, J = 8.0 Hz, 1H), 7.23 (d, J = 1.6 Hz, 1H), 7.22 – 7.08 (m, 1H), 6.96 (dd, J = 8.1, 1.7 Hz, 1H), 6.93 – 6.79 (m, 3H), 6.22 (d, J = 15.0 Hz, 1H), 6.00 (s, 2H), 4.35 (ddd, J = 8.0, 5.3, 4.3 Hz, 1H), 3.77 – 3.57 (m, 2H). 13C NMR (101 MHz, DMSO-d6) δ 172.63, 165.80, 148.48, 148.29, 140.43, 138.74, 131.36, 125.70, 124.69, 123.26, 108.98, 106.23, 101.80, 61.99, 55.34. LC-MS calculated for C15H15NO6 expected [M]: 305.3; found [M+H]+: 306.1.

**2-((2E,4E)-5-(benzo[d][1,3]dioxol-5-yl)penta-2,4-dienamido)-3-(4-hydroxyphenyl)propanoic acid(2r)**

Yield 77.84%. 1H NMR (400 MHz, DMSO-d6) δ 9.16 (s, 1H), 8.28 (d, J = 8.1 Hz, 1H), 7.21 (s, 1H), 7.07 (dd, J = 15.0, 9.8 Hz, 1H), 7.02 – 6.80 (m, 6H), 6.65 – 6.57 (m, 2H), 6.10 (d, J = 14.9 Hz, 1H), 6.00 (s, 2H), 4.39 (td, J = 8.9, 4.9 Hz, 1H), 3.03 – 2.69 (m, 2H). 13C NMR (101 MHz, DMSO-d6) δ 173.82, 165.68, 156.43, 148.47, 148.30, 140.42, 138.73, 131.36, 130.52, 128.25, 125.69, 124.52, 123.25, 115.51, 108.98, 106.20, 101.80, 54.54, 36.61. LC-MS calculated for C21H19NO6 expected [M]: 381.4; found [M+H]+: 382.2.

**2-((2E,4E)-5-(benzo[d][1,3]dioxol-5-yl)penta-2,4-dienamido)-3-mercaptopropanoic acid(2s)**

Yield 77.84%. 1H NMR (400 MHz, Chloroform-d) δ 7.38 (dd, 1H), 7.00 – 6.80 (m, 2H), 6.83 – 6.69 (m, 2H), 6.67 (d, 1H), 5.99 (s, 2H), 5.25 (d, 1H), 4.83 – 4.66 (m, 2H), 3.75 – 2.81 (m, 2H).13C NMR (101 MHz, DMSO-d6) δ 172.27, 165.83, 148.49, 148.34, 140.77, 138.96, 131.33, 125.66, 124.31, 123.32, 108.99, 106.24, 101.82, 55.09, 26.19. LC-MS calculated for C15H15NO5Sexpected [M]: 321.4; found [M+H]+: 322.1.

**((2E,4E)-5-(benzo[d][1,3]dioxol-5-yl)penta-2,4-dienoyl)tryptophan (2t)**

Yield 67.64%.1H NMR (400 MHz, DMSO-d6) δ 10.79 (d, J = 2.4 Hz, 1H), 8.32 (d, J = 7.9 Hz, 1H), 7.50 (d, J = 7.8 Hz, 1H), 7.29 (d, J = 8.1, 0.9 Hz, 1H), 7.22 (d, J = 1.7 Hz, 1H), 7.13 – 7.02 (m, 2H), 7.06 – 6.98 (m, 1H), 6.98 – 6.89 (m, 2H), 6.88 – 6.78 (m, 3H), 6.12 (d, J = 15.0 Hz, 1H), 6.00 (s, 2H), 4.58 – 4.48 (m, 1H), 3.25 – 2.86 (m, 2H).13C NMR (101 MHz, Chloroform-d) δ 169.10, 158.89, 148.53, 148.33, 141.95, 139.49, 136.21, 130.97, 128.89, 125.64, 122.97, 122.82, 122.54, 121.28, 119.76, 118.81, 111.34, 110.26, 108.59, 105.89, 61.64, 53.42, 27.95, 14.17. LC-MS calculated for C23H20N2O5 expected [M]: 404.4; found [M+H]+: 405.4.

**Methyl 2-((2E,4E)-5-(3,4-dihydroxyphenyl) penta-2,4-dienamido) propanoate（3a）**

Yield 82.04%.1H NMR (400 MHz, Methanol-d4) δ 7.27 (dd, J = 15.0, 9.5 Hz, 1H), 6.93 (s, 1H), 6.83 (dd, J = 8.2, 2.1 Hz, 1H), 6.80 – 6.63 (m, 3H), 6.06 (d, J = 15.0 Hz, 1H), 4.47 (q, J = 7.3 Hz, 1H), 3.70 (s, 3H), 1.39 (d, J = 7.3 Hz, 3H). 13C NMR (101 MHz, Methanol-d4) δ 173.53, 167.57, 146.58, 145.29, 142.05, 140.17, 128.64, 123.26, 121.06, 119.94, 115.15, 113.10, 51.41, 48.31, 16.18. LC-MS calculated for C15H17NO5 expected [M]: 291.3; found [M+H]+: 292.1.

**Ethyl 2-((2E,4E)-5-(3,4-dihydroxyphenyl)penta-2,4-dienamido)acetate(3b)**

Yield 58.14%. 1H NMR (400 MHz, Methanol-d4) δ 7.28 (dd, J = 15.1, 9.4 Hz, 1H), 6.94 (d, J = 2.0 Hz, 1H), 6.83 (dd, J = 8.2, 2.1 Hz, 1H), 6.77 – 6.66 (m, 3H), 6.06 (d, J = 15.0 Hz, 1H), 3.99 (d, J = 6.3 Hz, 2H), 3.71 (s, 2H), 1.32 – 1.13 (m, 0H). 13C NMR (101 MHz, Methanol-d4) δ 170.59, 168.24, 146.62, 145.31, 142.12, 140.26, 128.63, 123.24, 120.99, 119.96, 115.14, 113.10, 51.27, 40.67, -1.39. LC-MS calculated for C15H17NO5 expected [M]: 291.3; found [M+H]+: 292.1.

**Ethyl 2-((2E,4E)-5-(3,4-dihydroxyphenyl)penta-2,4-dienamido)-3-methylbutanoate(3c)**

Yield 78.63%. 1H NMR (400 MHz, Methanol-d4) δ 7.33 – 7.23 (m, 1H), 6.94 (d, J = 2.1 Hz, 1H), 6.83 (dd, J = 8.2, 2.0 Hz, 1H), 6.76 – 6.69 (m, 3H), 6.16 (d, J = 15.0, 2.4 Hz, 1H), 4.38 (dd, J = 8.3, 6.1 Hz, 1H), 4.26 – 4.03 (m, 1H), 2.21 – 2.08 (m, 1H), 1.25 (t, J = 7.1 Hz, 3H), 0.99 – 0.82 (m, 6H). 13C NMR (101 MHz, Methanol-d4) δ 146.60, 145.31, 142.13, 140.16, 128.66, 123.31, 121.13, 119.92, 115.15, 113.11, 60.82, 58.16, 30.59, 18.16, 17.26, 13.20. LC-MS calculated for C18H23NO5 expected [M]: 333.4; found [M+H]+: 334.2.

**methyl ((2E,4E)-5-(3,4-dihydroxyphenyl)penta-2,4-dienoyl)methioninate (3d)**

Yield 86.24%. 1H NMR (400 MHz, Methanol-d4) δ 7.28 (dd, J = 14.9, 9.8 Hz, 1H), 6.94 (d, J = 2.0 Hz, 1H), 6.83 (dd, J = 8.2, 2.1 Hz, 1H), 6.77 – 6.69 (m, 3H), 6.08 (dd, J = 15.0, 2.1 Hz, 1H), 4.63 (td, J = 9.3, 4.9 Hz, 1H), 3.32 (s, 3H), 2.63 – 2.44 (m, 2H), 2.12 – 1.91 (m, 5H). 13C NMR (101 MHz, Methanol-d4) δ 172.67, 167.93, 142.22, 140.30, 128.64, 123.25, 120.97, 119.96, 115.15, 113.12, 61.12, 51.47, 48.31, 47.03, 30.80, 29.83, 13.87. LC-MS calculated for C17H21NO5 S expected [M]: 351.4; found [M+H]+: 352.1.

**Ethyl ((2E,4E)-5-(3,4-dihydroxyphenyl)penta-2,4-dienoyl)leucinatee (3e)**

Yield 81.29%.1H NMR (400 MHz, Methanol-d4) δ 7.27 (dd, J = 15.0, 9.5 Hz, 1H), 6.93 (s, 1H), 6.87 – 6.65 (m, 4H), 6.07 (d, J = 15.0 Hz, 1H), 4.56 – 4.48 (m, 1H), 3.69 (s, 3H), 1.62 (d, J = 7.2 Hz, 2H), 1.28 – 1.20 (m, 1H), 0.93 (dd, J = 13.7, 6.2 Hz, 8H). 13C NMR (101 MHz, Methanol-d4) δ 173.48, 167.88, 146.61, 145.31, 142.11, 140.22, 128.64, 123.27, 121.04, 119.94, 115.15, 113.11, 51.33, 51.00, 40.26, 24.74, 21.93, 20.50, 13.14. LC-MS calculated for C17H25NO5 S expected [M]: 347.4; found [M+H]+: 348.2.

**2-((2E,4E)-5-(3,4-dihydroxyphenyl) penta-2,4-dienamido) propanoic acid(3k)**

Yield 91.09%. 1H NMR (400 MHz, Methanol-d4) δ 7.26 (dd, 1H), 6.93 (s, 1H), 6.83 (dd, J = 8.2, 2.1 Hz, 1H), 6.83 – 6.65 (m, 3H), 6.06 (d, J = 15.0 Hz, 1H), 4.47 (q, J = 7.3 Hz, 1H), 1.39 (d, J = 7.3 Hz, 3H). 13C NMR (101 MHz, Methanol-d4) δ 173.54, 167.58, 146.60, 145.30, 142.06, 140.19, 128.64, 123.27, 121.06, 119.95, 115.15, 113.10, 51.41, 16.18. LC-MS calculated for C14H15NO5 expected [M]: 277.3; found [M+H]+: 278.1.

**2-((2E,4E)-5-(3,4-dihydroxyphenyl)penta-2,4-dienamido)acetic acid(3l)**

Yield 58.33%. 1H NMR (400 MHz, Methanol-d4) δ 7.29 (dd, J = 15.3, 9.2 Hz, 1H), 6.94 (s, 1H), 6.83 (dd, J = 8.2, 2.1 Hz, 1H), 6.76 – 6.70 (m, 3H), 6.08 (d, J = 15.1 Hz, 1H), 4.01 (s, 2H).13C NMR (101 MHz, Methanol-d4) δ 172.04, 16711, 148.58, 148.21, 140.50, 138.68, 130.37, 125.78, 124.43, 123.28, 108.98, 106.25, 42.27. LC-MS calculated for C13H13NO5 expected [M]: 263.3; found [M+H]+: 264.1.

**2-((2E,4E)-5-(3,4-dihydroxyphenyl)penta-2,4-dienamido)-3-methylbutanoic acid(3m)**

Yield 61.2%.1H NMR (400 MHz, Methanol-d4) δ 7.35 (dd, J = 14.9, 10.6 Hz, 1H), 6.96 (s, 1H), 6.87 (dd, J = 8.1, 1.7 Hz, 1H), 6.79 – 6.61 (m, 3H), 6.08 (d, J = 8.9 Hz, 1H), 5.99 (s, 0H), 5.96 (s, 2H), 4.66 (dd, J = 8.8, 4.9 Hz, 1H), 4.20 (qq, J = 7.0, 3.6 Hz, 2H), 2.19 (pd, 1H), 1.28 (t, J = 7.1 Hz, 3H), 0.94 (dd, J = 12.6, 6.9 Hz, 6H). 13C NMR (101 MHz, Methanol-d4) δ 172.38, 168.04, 146.61, 145.30, 142.27, 140.25, 128.64, 123.29, 120.99, 119.96, 115.16, 113.12, 58.14, 30.58, 18.15, 17.29. LC-MS calculated for C16H19NO5 expected [M]: 305.3; found [M+H]+: 306.1.

**2-((2E,4E)-5-(3,4-dihydroxyphenyl)penta-2,4-dienamido)-4-(methylthio)butanoic acid(3n)**

Yield 69.60%.1H NMR (400 MHz, Methanol-d4) δ 7.40 – 7.23 (m, 1H), 6.96 (s, 1H), 6.87 (dd, J = 8.1, 1.6 Hz, 1H), 6.79 – 6.62 (m, 3H), 6.32 (d, J = 7.1 Hz, 1H), 5.96 (s, 2H), 4.80 (d, J = 7.1 Hz, 1H), 4.29 – 4.11 (m, 2H), 2.60 – 2.46 (m, 2H), 2.09 (s, 3H), 1.28 (d, J = 10.3 Hz, 3H). 13C NMR (101 MHz, Methanol-d4) δ 172.70, 167.94, 146.61, 145.30, 142.26, 140.33, 128.65, 123.28, 121.00, 120.02, 115.19, 113.17, 51.53, 30.80, 29.84, 13.92. LC-MS calculated for C16H19NO5Sexpected [M]: 337.4; found [M+H]+: 338.1.

**2-((2E,4E)-5-(3,4-dihydroxyphenyl)penta-2,4-dienamido)-4-methylpentanoic acid(3o)**

Yield 85.63%. 1H NMR (400 MHz, Methanol-d4) δ 7.27 (dd, J = 15.0, 9.6 Hz, 1H), 6.93 (d, J = 2.0 Hz, 1H), 6.83 (dd, J = 8.2, 2.1 Hz, 1H), 6.79 – 6.65 (m, 3H), 6.07 (d, J = 15.0 Hz, 1H), 4.52 (dd, J = 8.4, 6.4 Hz, 1H), 1.83 – 1.44 (m, 3H), 0.93 (dd, J = 13.6, 6.2 Hz, 6H). 13C NMR (101 MHz, Methanol-d4) δ 173.52, 167.90, 146.60, 145.30, 142.15, 140.24, 128.66, 123.29, 121.06, 119.99, 115.19, 113.15, 51.38, 40.26, 24.74, 21.96, 20.54. LC-MS calculated for C17H21NO5 expected [M]: 319.4; found [M+H]+: 320.1.
